# Supplementary material
Source: ML conference proceedings conference paper supplement (https://proceedings.neurips.cc/paper_files/paper/2018/hash/c2f32522a84d5e6357e6abac087f1b0b-Abstract.html)
Supplement: Supplementary file [file c2f32522a84d5e6357e6abac087f1b0b-Supplemental.zip]

---

# Supplementary material: Scaling Gaussian Process Regression with Derivatives

---

**David Eriksson**

Center for Applied Mathematics  
Cornell University  
Ithaca, NY 14853  
dme65@cornell.edu

**Kun Dong**

Center for Applied Mathematics  
Cornell University  
Ithaca, NY 14853  
kd383@cornell.edu

**Eric Hans Lee**

Department of Computer Science  
Cornell University  
Ithaca, NY 14853  
ehl59@cornell.edu

**David Bindel**

Department of Computer Science  
Cornell University  
Ithaca, NY 14853  
bindel@cornell.edu

**Andrew Gordon Wilson**

Department of Operations Research  
and Information Engineering  
Cornell University  
Ithaca, NY 14853  
agw62@cornell.edu

## 1 Kernels

The covariance functions we consider in this paper are the squared exponential (SE) kernel

$$k_{\text{SE}}(x, y) = s^2 \exp\left(-\frac{\|x - y\|^2}{2\ell^2}\right)$$

and the spline kernels

$$k_{\text{spline}}(x, y) = \begin{cases} s^2(\|x - y\|^3 + a\|x - y\|^2 + b) & d \text{ odd} \\ s^2(\|x - y\|^2 \log \|x - y\| + a\|x - y\|^2 + b) & d \text{ even} \end{cases}$$

where  $a, b$  are chosen to make the spline kernel symmetric and positive definite on the given domain.

## 2 Kernel Derivatives

The first and second order derivatives of the SE kernel are

$$\begin{aligned} \frac{\partial k_{\text{SE}}(x^{(i)}, x^{(j)})}{\partial x_p^{(j)}} &= \frac{x_p^{(i)} - x_p^{(j)}}{\ell^2} k_{\text{SE}}(x^{(i)}, x^{(j)}), \\ \frac{\partial^2 k_{\text{SE}}(x^{(i)}, x^{(j)})}{\partial x_p^{(i)} \partial x_q^{(j)}} &= \frac{1}{\ell^4} \left( \ell^2 \delta_{pq} - (x_p^{(i)} - x_p^{(j)})(x_q^{(i)} - x_q^{(j)}) \right) k_{\text{SE}}(x^{(i)}, x^{(j)}). \end{aligned}$$

This shows that each  $n$ -by- $n$  block of  $\partial K$  and  $\partial^2$  admit Kronecker and Toeplitz structure if the points are on a grid.

### 3 Preconditioning

We discover that preconditioning is crucial for the convergence of iterative solvers using approximation schemes such as D-SKI and D-SKIP. To illustrate the performance of conjugate gradient (CG) method with and without the above-mentioned truncated pivoted Cholesky preconditioner, we test D-SKI on the 2D Franke function with 2000 data points, and D-SKIP on the 5D Friedman function with 1000 data points. In both cases, we compute a pivoted Cholesky decomposition truncated at rank 100 for preconditioning, and the number of steps it takes for CG/PCG to converge are demonstrated in Figure 1 below. It is clear that preconditioning universally and significantly reduces the number of steps required for convergence.

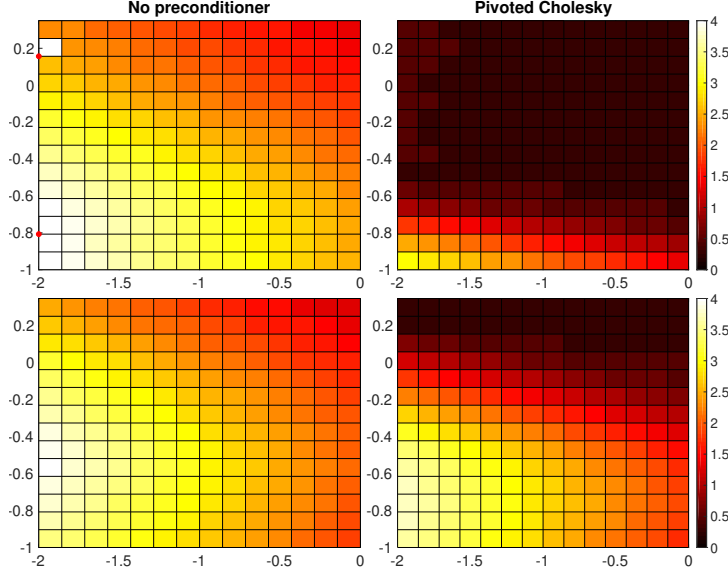

Figure 1: The color shows  $\log_{10}$  of the number of iterations to reach a tolerance of  $1e-4$ . The first row compares D-SKI with and without a preconditioner. The second row compares D-SKIP with and without a preconditioner. The red dots represent no convergence. The y-axis shows  $\log_{10}(\ell)$  and the x-axis  $\log_{10}(\sigma)$  and we used a fixed value of  $s = 1$ .

### 4 Korea

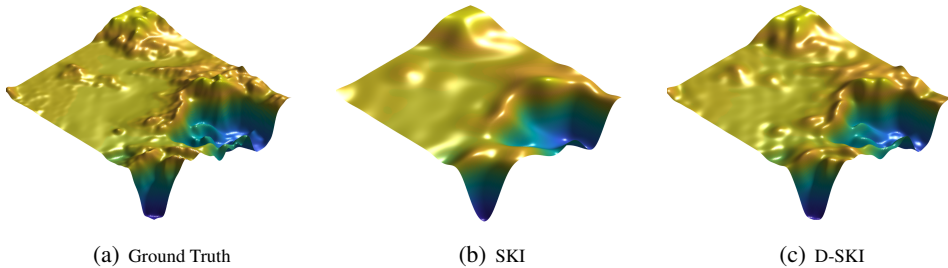

Figure 2: D-SKI is clearly able to capture more detail in the map than SKI. Note that inclusion of derivative information in this case leads to a negligible increase in calculation time.

The Korean Peninsula elevation and bathymetry dataset[1] is sampled at a resolution of 12 cells per degree and has  $180 \times 240$  entries on a rectangular grid. We take a smaller subgrid of  $17 \times 23$  points as training data. To reduce data noise, we apply a Gaussian filter with  $\sigma_{\text{filter}} = 2$  as a pre-processing step. We observe that the recovered surfaces with SKI and D-SKI highly resemble their respective counterparts with exact computation and that incorporating gradient information enables us to recover more terrain detail.

|       | $\ell$ | $s$     | $\sigma$ | SMAE   | Time[s] |
|-------|--------|---------|----------|--------|---------|
| SKI   | 16.786 | 855.406 | 184.253  | 0.1521 | 10.094  |
| D-SKI | 9.181  | 719.376 | 29.486   | 0.0746 | 11.643  |

## References

- [1] MATLAB mapping toolbox, 2017. The MathWorks, Natick, MA, USA.
